# Supplementary material
Source: publisher figshare collection journal article supplement (https://acs.figshare.com/ndownloader/files/4105507)
Supplement: Supplementary file 1 [file 4105507]

Supplementary Table 6. Dissociation constant resulted from surface plasmon resonance analyses (in PBS running buffer)

|             | MBP <sup>a</sup>   | <i>Pf</i> ERC            |
|-------------|--------------------|--------------------------|
| N-89        | N. D. <sup>b</sup> | $4.3 \times 10^{-3}$ (M) |
| N-251       | N. D. <sup>b</sup> | N. D. <sup>b</sup>       |
| Artemisinin | N. D. <sup>b</sup> | N. D. <sup>b</sup>       |

<sup>a</sup>Maltose binding protein

<sup>b</sup>Not determined

SPR analyzes were carried out using ProteOn XPR36 (Bio-Rad). *Pf*ERC or MBP (Maltose binding protein) was immobilized to the GLH sensor chip (Bio-Rad) by amine coupling chemistry. Each endoperoxides (N-89, N-251, and artemisinin) were diluted in PBS running buffer (containing 0.1% Tween20 and 10% DMSO), and injected at a rate of 50  $\mu$ L/min for 1 min.
